# Supplementary material for: Gold patterned biochips for on-chip immuno-MALDI-TOF MS: SPR imaging coupled multi-proteinMS analysis
Source: Royal Society of Chemistry journal article supplement (doi:10.1039/c1an15659d), 2011-11-16
Supplement: c1an15659d.pdf [file c1an15659d.pdf]

## Electronic Supplementary Information

### Gold patterned biochips for on chip immuno-MALDI-TOF MS: SPR imaging coupled multi-protein MS analysis

Young Eun Kim<sup>a,b</sup>, So Yeon Yi<sup>a</sup>, Chang-Soo Lee<sup>a,b</sup>, Yongwon Jung<sup>\*a,b</sup> and Bong Hyun Chung<sup>\*a,b</sup>

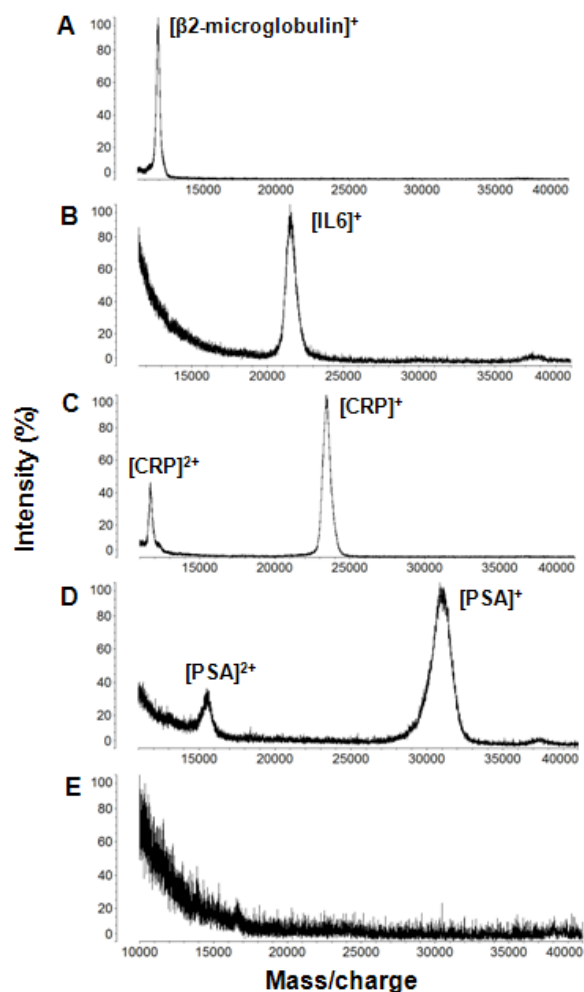

**Figure S1.** MALDI mass spectra of immuno-captured antigens on protein G layers from complex protein mixtures : Antibody for  $\beta 2$ -microglobulin (A), IL-6 (B), CRP (C), PSA (D) or human IgG (E) was immobilized onto each gold surface (covered with protein G layer) of the biochip.

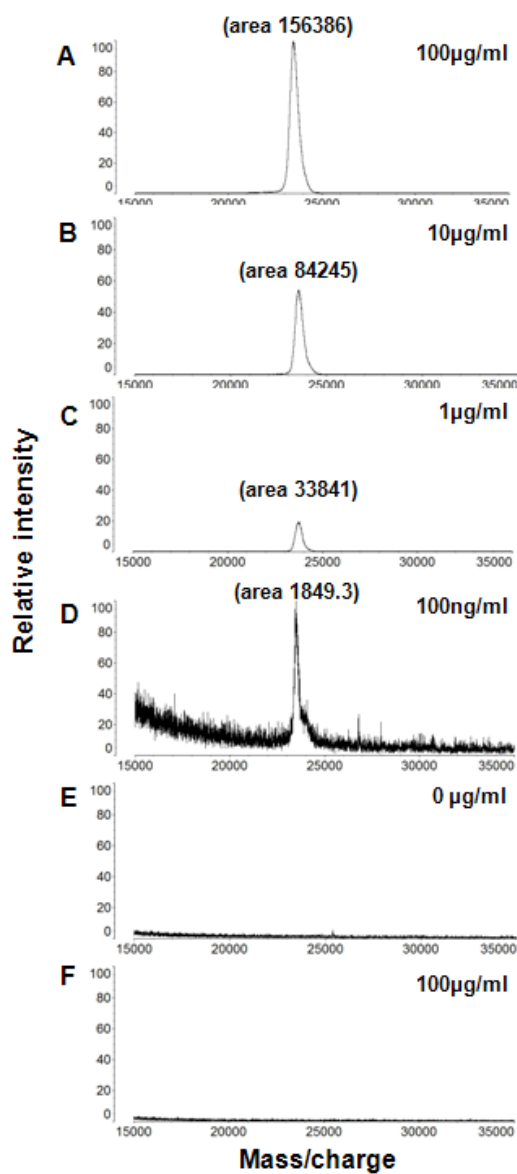

**Figure S2.** MALDI mass spectra of immuno-captured CRP on anti-CRP antibody (A-E) or control human IgG (F) immobilized surface. A series concentration (100 – 0.1 µg/mL) of CRP was treated on each antibody layers. Mass spectra were acquired by 100 profiles containing 10 shots.

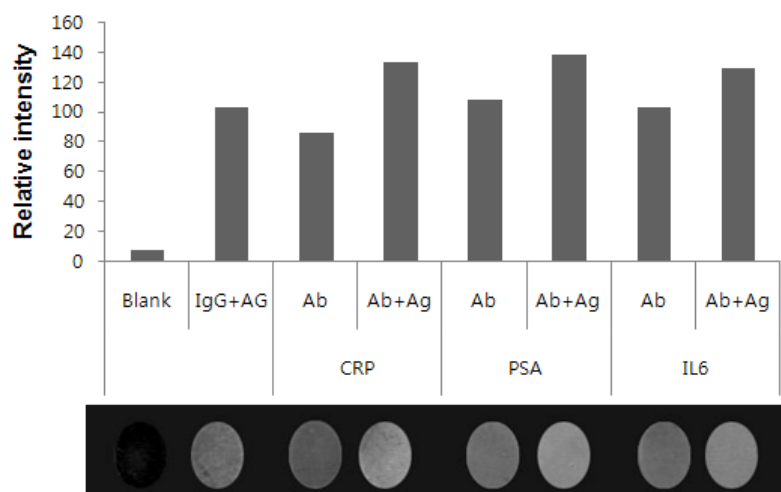

**Figure S3.** SPR image of antibody- antigen binding to Cys3-protein G layers of a gold patterned biochip. Control experiment was treated with only PBS. Control IgG and antibody for CRP, PSA or IL6 were immobilized to a gold surface and each antigens CRP, PSA or IL6 was bound to their corresponding antibody. Ab: antibody, Ag: antigen.

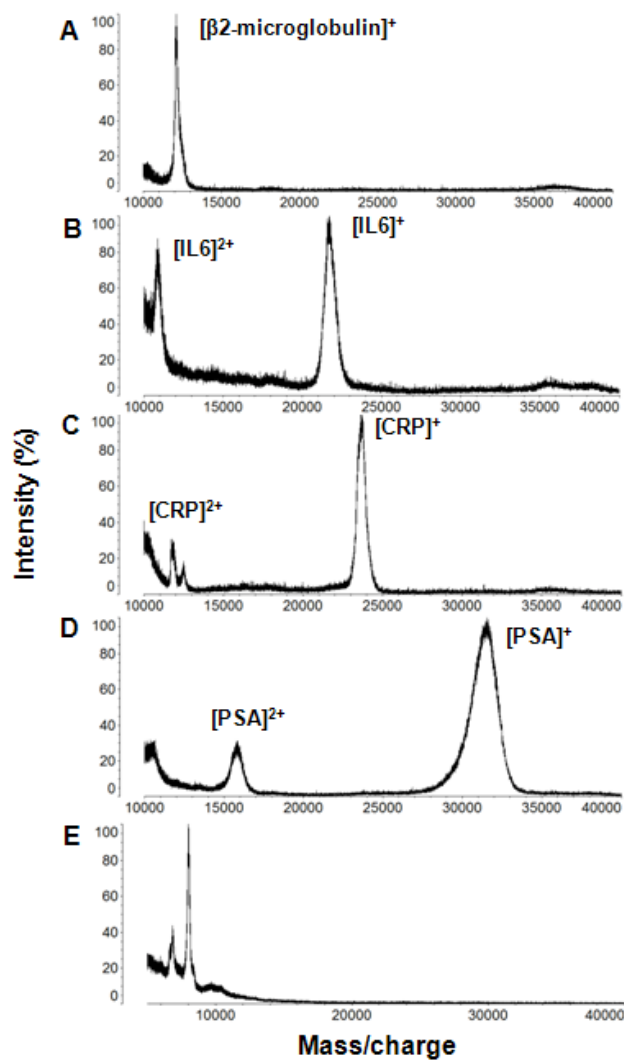

**Figure S4.** MALDI mass spectra of immuno-captured antigens from protein mixtures in human serum sample. : Antibody for  $\beta 2$ -microglobulin (A), IL6 (B), CRP (C), PSA (D) or human IgG (E) was immobilized onto each gold surface of the biochip.
